# Supplementary material
Source: publisher figshare collection journal article supplement (https://frontiersin.figshare.com/ndownloader/files/13812647)
Supplement: Supplementary file [file 13812647]

*Supplementary Material*

**Metformin Promotes the Protection of Mice Infected with *Plasmodium yoelii* Independently of  $\gamma\delta$  T Cell Expansion**

**Mana Miyakoda, Ganchimeg Bayarsaikhan, Daisuke Kimura, Masoud Akbari,  
Heiichiro Udonon and Katsuyuki Yui\***

**\* Correspondence:** Katsuyuki Yui, M.D., Ph.D.: [katsu@nagasaki-u.ac.jp](mailto:katsu@nagasaki-u.ac.jp)

# 1 Supplementary Figures

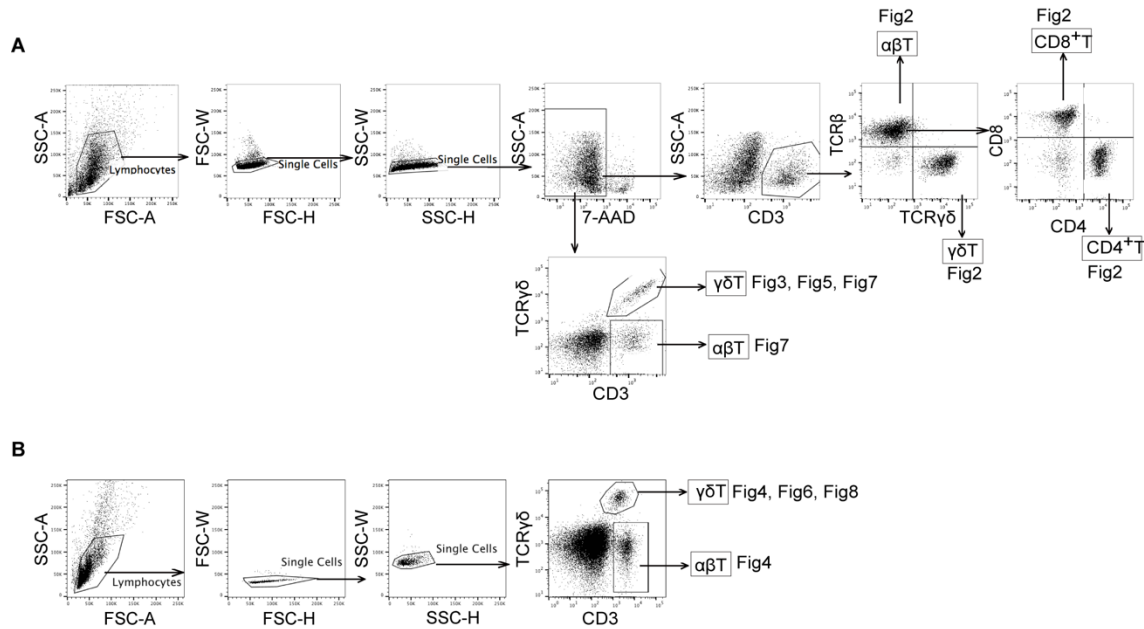

**Figure S1 | Gating strategy used for flow cytometry analysis. (A)** Spleen cells were stained with mAbs against CD3, TCRβ, TCRγδ, and other markers, and 7-AAD, which was used to exclude dead cells. Gating strategies for αβ T cells, γδ T cells, CD4<sup>+</sup> T cells, and CD8<sup>+</sup> T cells used to analyze their relative proportions (Fig. 2), their expression of cell-surface molecules (Fig. 3, 5), and their metabolic status (Fig. 7). **(B)** Gating strategy used with γδ T cells to analyze BrdU incorporation (Fig. 4), apoptosis (Fig. 4), and intracellular staining (Fig. 6, 8).

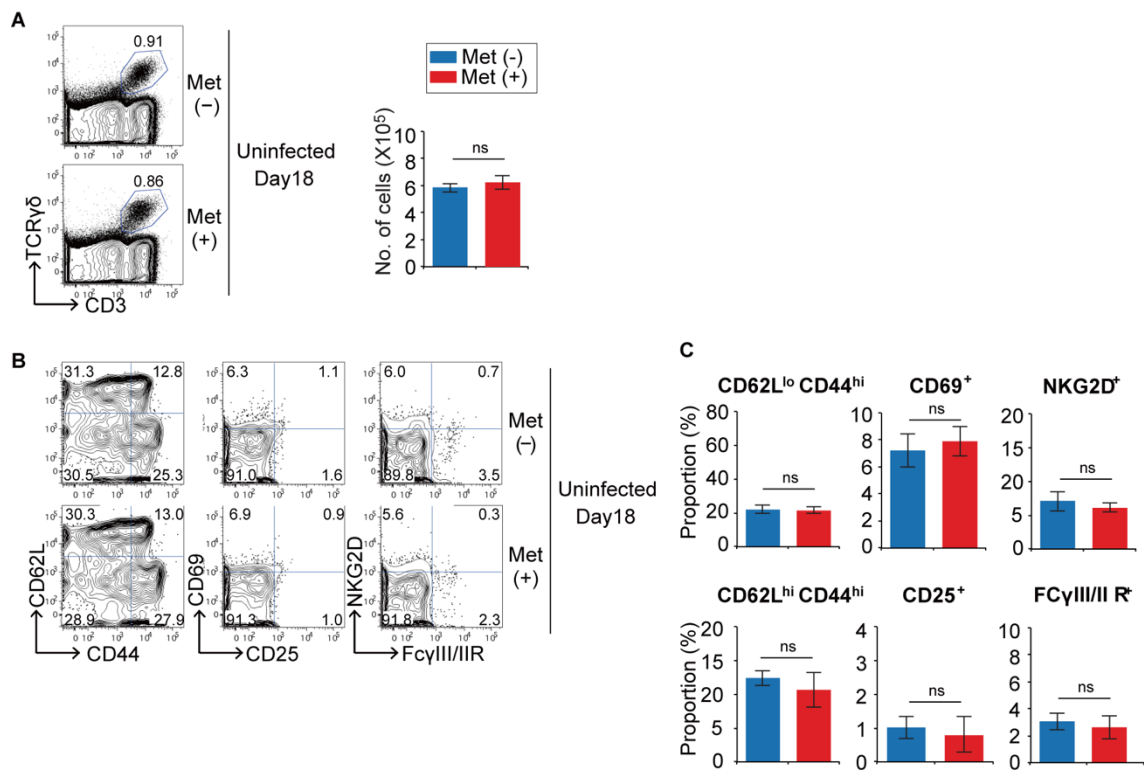

**Figure S2 | The effect of metformin on  $\gamma\delta$ T cells in uninfected mice.** B6 mice received (red) or did not receive (blue) metformin in drinking water for 18 days (3 mice/group). **(A)** Splenocytes were stained for CD3 and TCR $\gamma\delta$  expression, and analyzed by flow cytometry (left). The numbers in the plots indicate the proportions (%) of the cells. Total numbers of  $\gamma\delta$  T cells were calculated by multiplying the total splenocyte numbers by the proportions of  $\gamma\delta$  T cells (right). **(B, C)** Splenocytes were stained for CD3,  $\gamma\delta$ TCR as well as CD62L vs. CD44, CD69 vs. CD25 and NKG2D vs. Fc $\gamma$ III/II R, and analyzed by flow cytometry. Representative plots of CD3<sup>+</sup>  $\gamma\delta$ TCR<sup>+</sup>-gated cells **(B)** and their proportions in CD3<sup>+</sup>  $\gamma\delta$ TCR<sup>+</sup> cells are shown **(C)**. The numbers shown in each quadrant represent their relative proportions. Statistical significance was assessed using unpaired t-test with Welch's correction. \* $p < 0.05$ ; ns, not significant.

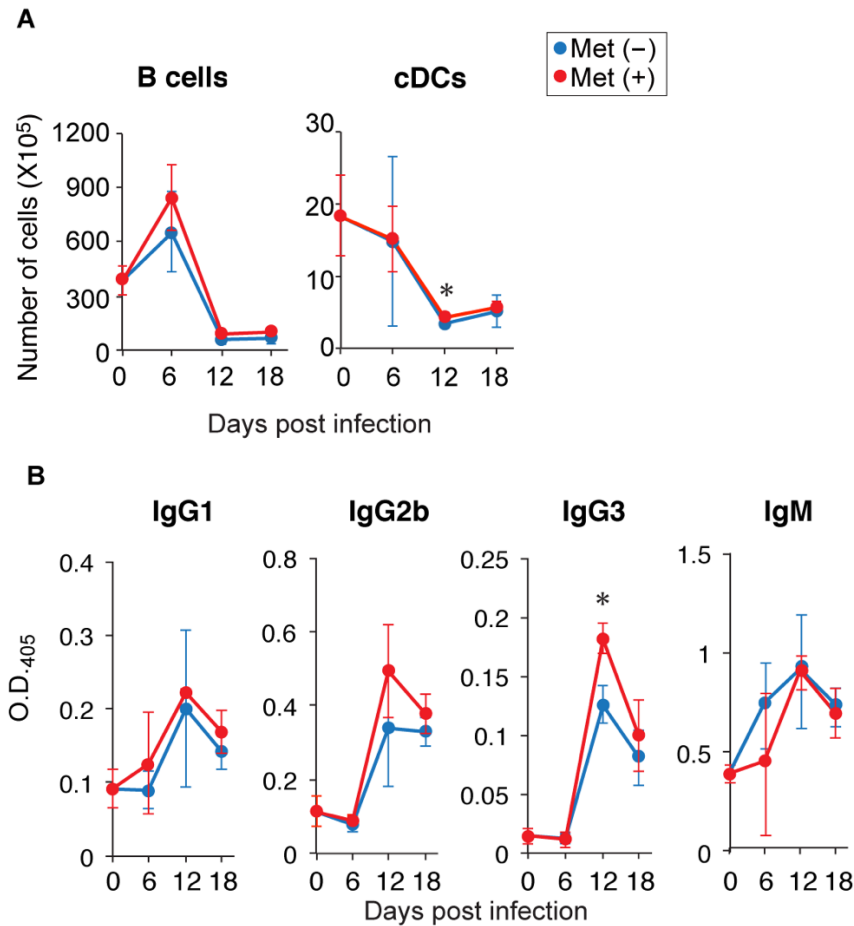

**Figure S3 | The effect of metformin on B cells, dendritic cells, and antibody production in *P. yoelii*-infected mice.** B6 mice were infected with *P. yoelii* 17XNL and received (Met<sup>+</sup>) or did not receive (Met<sup>-</sup>) metformin for 18 days, as described in Fig. 1 (3 mice/group). Mice were sacrificed at 0, 6, 12 and 18 days post-infection, and splenocyte and serum were collected. **(A)** Splenocytes from the infected mice were stained for CD19 vs. B220 or CD11c vs. MHC class II. The numbers of B cells (CD19<sup>+</sup> B220<sup>+</sup>) and conventional dendritic cells (CD11c<sup>+</sup> MHC class II<sup>+</sup>) in the spleens were calculated. **(B)** The level of serum antibodies in each mouse was determined by ELISA. Plates coated with *P. yoelii* extract were added with serum at a 1: 20 dilution, and specific antibodies were detected with biotin-conjugated anti-mouse IgG1, IgG2b, IgG3, or IgM antibodies. Statistical analysis was performed using unpaired t-test with Welch's correction. \*p < 0.05

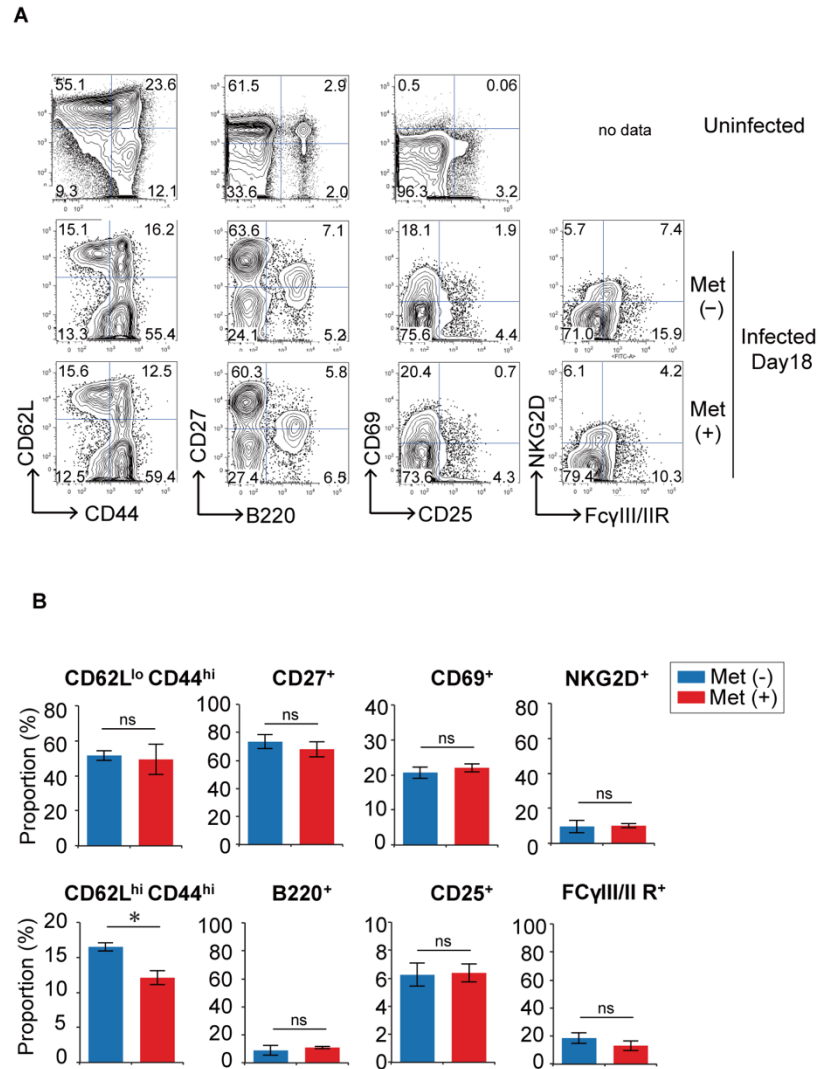

**Figure S4 | The effect of metformin on the phenotype of  $\alpha\beta$ T cells in *P. yoelii*-infected mice.** Uninfected B6 mice or B6 mice infected with *P. yoelii* 17XNL, which received (Met<sup>+</sup>) or did not receive (Met<sup>-</sup>) metformin for 18 days, as described in Fig. 1 (3 mice/group). Splenocytes from uninfected and metformin-treated (Met<sup>+</sup>) and untreated (Met<sup>-</sup>) infected mice were stained for CD3,  $\gamma\delta$ TCR, and other cell-surface markers. Representative plots of these molecules on  $\alpha\beta$  T (CD3<sup>+</sup>  $\gamma\delta$ TCR<sup>-</sup>) cells (**A**) and the proportions of these populations in  $\alpha\beta$  T cells are shown (**B**). Statistical significance was assessed using the unpaired t-test with Welch's correction. \*p < 0.05; ns, not significant.

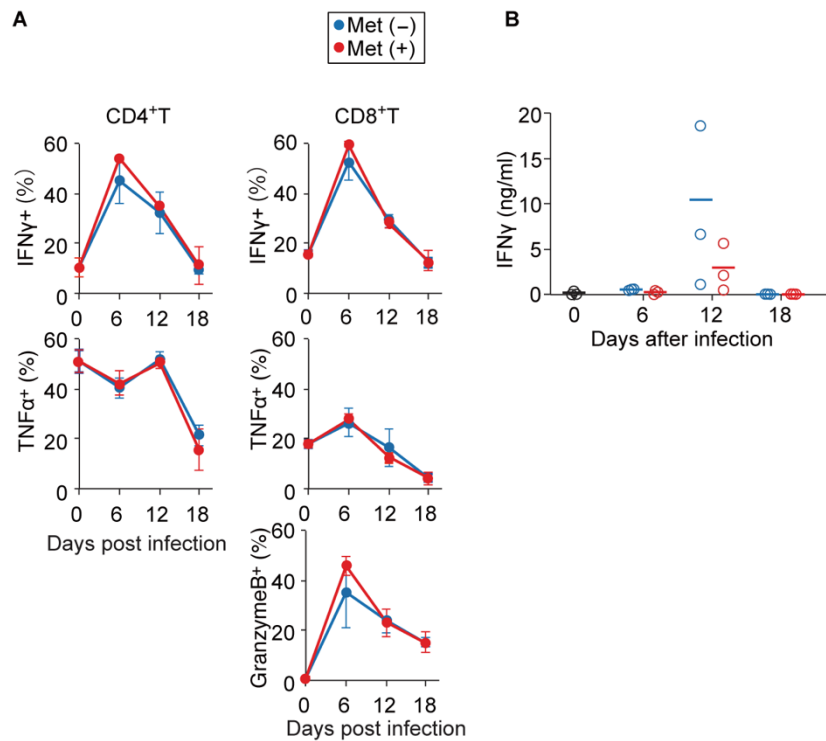

**Figure S5 | Cytokine production by  $\alpha\beta$  T cells in *P. yoelii*-infected mice.** B6 mice received (red) or did not receive (blue) metformin in drinking water for 18 days (3 mice/group). **(A)** Splenocytes from the infected mice were stimulated with PMA and ionomycin for 4 h; surfaced stained for CD3, CD4, and CD8; and intracellularly stained for IFN- $\gamma$ , TNF $\alpha$ , or Granzyme B. **(B)** Serum was collected 18 days after infection, and the levels of IFN- $\gamma$  were determined by ELISA. Statistical analysis was performed using the unpaired t test. No significant difference was observed between the metformin-treated and untreated mice.

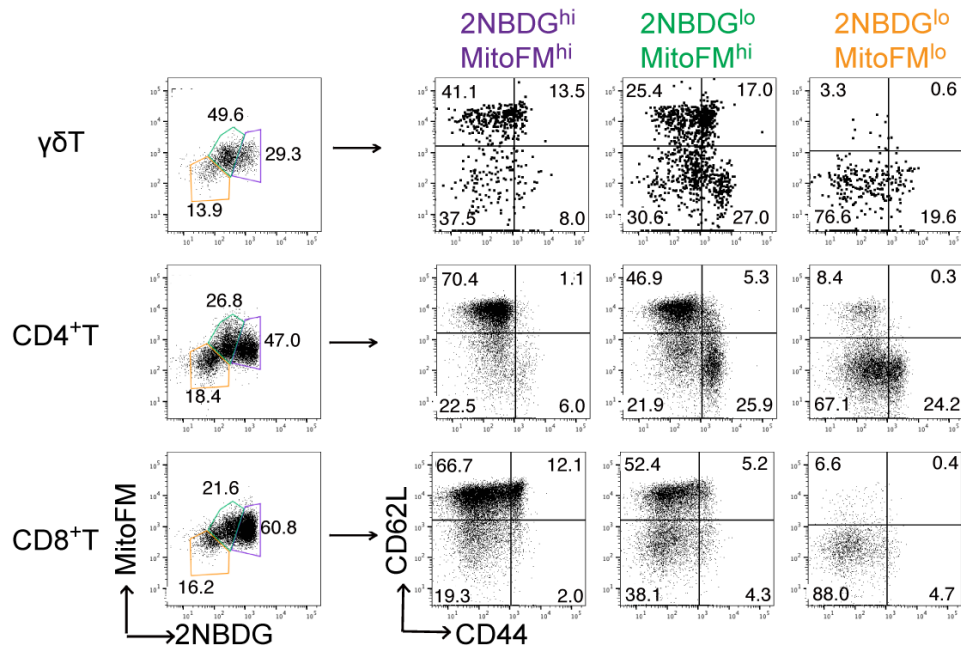

**Figure S6 | Spleen cells from uninfected mice were stained for CD3, TCR $\gamma\delta$ , CD4, CD8, CD62L, and CD44 in combination with 2NBDG and MitoFM. CD62L vs. CD44 profiles of the 2NBDG<sup>hi</sup> MitoFM<sup>hi</sup> (purple), 2NBDG<sup>lo</sup> MitoFM<sup>hi</sup> (green), and 2NBDG<sup>lo</sup> MitoFM<sup>lo</sup> (orange) subpopulations are shown. Numbers shown by the gating (left) and in the quadrants (right) indicate the proportions of cells. The data shown represent staining of spleen cells from 4 mice with similar results.**

## 2 Supplementary materials and methods

### ELISA

The levels of anti-*P. yoelii* IgG1, IgG2b, IgG3, and IgM antibodies were determined by ELISA. Briefly, ELISA plates were coated with freeze-thaw lysate of *P. yoelii*-infected red blood cells ( $8 \times 10^6$  infected RBC/ well) in PBS overnight at 4°C, and blocked with PBS containing 10% FCS for 30 minutes at room temperature. After washing plates, serum was added at 1:20 dilution and incubated 2 hrs at room temperature. Plates were washed, incubated with biotin-conjugated rabbit anti-mouse IgG1, IgG2b, or IgM antibodies (ZyMED, San Francisco, CA, USA) or biotin-conjugated rat anti-mouse IgG3 mAb (Pharmingen) at 1:1000 dilution, washed, and incubated with alkaline phosphatase-conjugated streptavidin (Jackson ImmunoResearch, West Grove, PA, USA) at 1:1000 dilution. After washing, 4-Nitrophenyl phosphate disodium salt hexahydrate (Sigma-Aldrich, MO, USA) solution was added to each well. The optical density at 405 nm was determined using a Microplate Reader (Bio-Lad, Hercules, CA, USA).

The level of IFN- $\gamma$  in serum were determine by a sandwich ELISA according to the manufacturer's directions using anti-mouse IFN- $\gamma$  mAb (R4-6A2) (e-Bioscience) for capture and biotinylated anti-mouse IFN- $\gamma$  mAb (XMGI.2) for the detection. The optical density values were determined at 405 nm using a Microplate Reader. The concentrations of IFN- $\gamma$  were calculated using a standard curve made by a serial dilution of the known concentrations of recombinant mouse IFN- $\gamma$  (PeproTech, NJ, USA).
